# Supplementary material for: Bilateral Internal Thoracic Artery Configuration for Coronary Artery Bypass Surgery: A Prospective Randomized Trial
Source: PubMed Central journal article supplement — Circ Cardiovasc Interv. 2016 Jul 19;9(7):e003518. doi: 10.1161/CIRCINTERVENTIONS.115.003518 (PMC4949001; doi:10.1161/circinterventions.115.003518), 2016-07-19
Supplement: hcv-9-e003518-s001.pdf [file hcv-9-e003518-s001.pdf]

## Supplemental Material

### Inclusion and Exclusion Criteria

| Inclusion Criteria                                                            | Exclusion Criteria                                                     |
|-------------------------------------------------------------------------------|------------------------------------------------------------------------|
| Angiographic evidence of severe(>70% by visual estimate) coronary obstruction | Diabetes with a HbA1c >7.5.                                            |
| Isolated CABG                                                                 | FEV1 <60% predicted value.                                             |
| Elective procedure                                                            | Body mass index >35                                                    |
| Age <75 years and life expectancy >5 years                                    | Reoperation                                                            |
|                                                                               | Other configuration then LIMA to LAD territory. RIMA to LCX territory. |

CABG indicates coronary artery bypass surgery; FEV1, forced expiratory volume in the first second; HbA1c, Hemoglobin A1C; LIMA, left internal mammary artery; RIMA, right internal mammary artery; LAD, left anterior descending artery; LCX, circumflex artery.
